# Supplementary material for: Mixing Performance of a Cost-effective Split-and-Recombine 3D Micromixer Fabricated by Xurographic Method
Source: PubMed Central journal article supplement (PMC6915444; doi:10.3390/mi10110786), 2019-11-16
Supplement: micromachines-10-00786-s001.pdf [file micromachines-10-00786-s001.pdf]

Article

# Mixing Performance of a Cost-effective Split-and-Recombine 3D Micromixer Fabricated by Xurographic Method

Ramezan Ali Taheri <sup>1,\*</sup>, Vahabodin Goodarzi <sup>2</sup> and Abdollah Allahverdi <sup>3</sup>

<sup>1</sup> Nanobiotechnology Research Center, Baqiyatallah University of Medical Sciences, Tehran 1435116471, Iran

<sup>2</sup> Applied Biotechnology Research Center, Baqiyatallah University of Medical Sciences, Tehran 1435116471, Iran; v.goodarzi@bmsu.ac.ir

<sup>3</sup> Biophysics Department, Faculty of Biological Sciences, Tarbiat Modares University, Tehran 14115-335, Iran; aallahverdi@gmail.com

\* Correspondence: taheri@bmsu.ac.ir; Tel.: +989126110865

Received: 1 October 2019; Accepted: 14 November 2019; Published: date

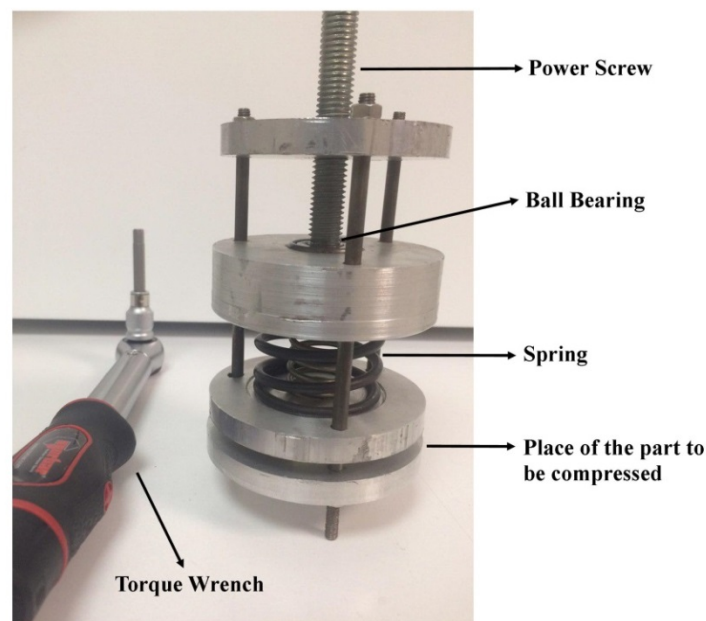

**Figure S1.** Image of the lab-made clamp used to adjust the exerted force on the microchips during the fabrication step. The idea is to use spring compression to linearly control the exerted force. A power screw is utilized to convert the rotary motion to linear motion. As the spring had a fixed spring constant, the applied force was adjustable. A torque wrench was used to precisely adjust the screw force. The calibration curve of the clamp force and the applied torque was previously obtained using a digital force sensor.
